# Supplementary material for: Determinants of nutrition knowledge, attitude and practices of adolescent sports trainee: A cross-sectional study in Bangladesh
Source: PubMed Central journal article supplement (PMC8056407; doi:10.1016/j.heliyon.2021.e06637), 2021-04-06
Supplement: mmc1.pdf [file mmc1.pdf]

## Nutrition knowledge, attitude and practices (KAP) of adolescent sports trainee in BKSP, Bangladesh

| Questionnaire                                                                                                                  |                                                                                                                                                                                                                                                                                                                                                                                                                                                                                               |                                |
|--------------------------------------------------------------------------------------------------------------------------------|-----------------------------------------------------------------------------------------------------------------------------------------------------------------------------------------------------------------------------------------------------------------------------------------------------------------------------------------------------------------------------------------------------------------------------------------------------------------------------------------------|--------------------------------|
| <b>Section A : Personal Questions</b>                                                                                          |                                                                                                                                                                                                                                                                                                                                                                                                                                                                                               |                                |
| 1. Age: _____                                                                                                                  | 2. Gender <input type="checkbox"/> Male <input type="checkbox"/> Female                                                                                                                                                                                                                                                                                                                                                                                                                       |                                |
| 3. Education : <input type="checkbox"/> School <input type="checkbox"/> College <input type="checkbox"/> University            |                                                                                                                                                                                                                                                                                                                                                                                                                                                                                               |                                |
| 3. Weight: _____                                                                                                               | 4. Height: _____                                                                                                                                                                                                                                                                                                                                                                                                                                                                              | 5. BMI: _____                  |
| 6. How many nutrition class/seminar/course have you attended since you started your training?                                  |                                                                                                                                                                                                                                                                                                                                                                                                                                                                                               |                                |
| 7. When was the last time you attended a nutrition class/seminar/course?                                                       |                                                                                                                                                                                                                                                                                                                                                                                                                                                                                               |                                |
| 8. From which sources have you obtained nutrition information?                                                                 | <input type="checkbox"/> Books <input type="checkbox"/> Magazines <input type="checkbox"/> Newspapers<br><input type="checkbox"/> Teachers <input type="checkbox"/> Coaches <input type="checkbox"/> Athlete Trainers<br><input type="checkbox"/> Doctors <input type="checkbox"/> Dieticians <input type="checkbox"/> Parents<br><input type="checkbox"/> Friends <input type="checkbox"/> Teammates <input type="checkbox"/> Internet<br><input type="checkbox"/> Other(Please state _____) |                                |
| 9. Name of the Sports Department?                                                                                              |                                                                                                                                                                                                                                                                                                                                                                                                                                                                                               |                                |
| 10. Duration of Training period                                                                                                |                                                                                                                                                                                                                                                                                                                                                                                                                                                                                               |                                |
| <b>Section B : Nutrition Knowledge</b> (For each of the following questions, tick the response that best answers the question) |                                                                                                                                                                                                                                                                                                                                                                                                                                                                                               |                                |
| 1. Protein is the main energy source for the muscle.                                                                           | <input type="checkbox"/> True                                                                                                                                                                                                                                                                                                                                                                                                                                                                 | <input type="checkbox"/> False |
| 2. Fats have important roles in the body.                                                                                      | <input type="checkbox"/> True                                                                                                                                                                                                                                                                                                                                                                                                                                                                 | <input type="checkbox"/> False |
| 3. Iron-deficiency anemia results in a decrease in the amount of oxygen that can be carried in the blood.                      | <input type="checkbox"/> True                                                                                                                                                                                                                                                                                                                                                                                                                                                                 | <input type="checkbox"/> False |
| 4. Iron in meat is absorbed at the same rate as iron in a plant food.                                                          | <input type="checkbox"/> True                                                                                                                                                                                                                                                                                                                                                                                                                                                                 | <input type="checkbox"/> False |
| 5. The body can make vitamin D upon exposure to the sun.                                                                       | <input type="checkbox"/> True                                                                                                                                                                                                                                                                                                                                                                                                                                                                 | <input type="checkbox"/> False |
| 6. Vitamin supplements are recommended for all physically active people.                                                       | <input type="checkbox"/> True                                                                                                                                                                                                                                                                                                                                                                                                                                                                 | <input type="checkbox"/> False |
| 7. During physical activity, feeling thirsty is enough to indicate the need for liquid.                                        | <input type="checkbox"/> True                                                                                                                                                                                                                                                                                                                                                                                                                                                                 | <input type="checkbox"/> False |
| 8. Skipping meals is justifiable if you need to lose weight quickly                                                            | <input type="checkbox"/> True                                                                                                                                                                                                                                                                                                                                                                                                                                                                 | <input type="checkbox"/> False |
| 9. Foods like chocolate, biscuits and chips are the most appropriate foods to be consumed soon after training                  | <input type="checkbox"/> True                                                                                                                                                                                                                                                                                                                                                                                                                                                                 | <input type="checkbox"/> False |
| 10. Vitamins are good sources of energy                                                                                        | <input type="checkbox"/> True                                                                                                                                                                                                                                                                                                                                                                                                                                                                 | <input type="checkbox"/> False |
| 11. Alcohol consumption can affect absorption and utilization of nutrients                                                     | <input type="checkbox"/> True                                                                                                                                                                                                                                                                                                                                                                                                                                                                 | <input type="checkbox"/> False |
| 12. Saturated and unsaturated oils both have an equal effect on the health                                                     | <input type="checkbox"/> True                                                                                                                                                                                                                                                                                                                                                                                                                                                                 | <input type="checkbox"/> False |

## Nutrition knowledge, attitude and practices (KAP) of adolescent sports trainee in BKSP, Bangladesh

|                                                                                                                                                                                                                  |                               |                                |   |   |   |
|------------------------------------------------------------------------------------------------------------------------------------------------------------------------------------------------------------------|-------------------------------|--------------------------------|---|---|---|
| 13. Eating carbohydrates makes you fat                                                                                                                                                                           | <input type="checkbox"/> True | <input type="checkbox"/> False |   |   |   |
| 14. Dehydration decreases performance                                                                                                                                                                            | <input type="checkbox"/> True | <input type="checkbox"/> False |   |   |   |
| 15. The last meal before a competition should be eaten 3-4 hours before the competition                                                                                                                          | <input type="checkbox"/> True | <input type="checkbox"/> False |   |   |   |
| 16. Males and females of the same age group spend equal amounts of calories during the same exercise                                                                                                             | <input type="checkbox"/> True | <input type="checkbox"/> False |   |   |   |
| 17. Bananas are good sources of potassium                                                                                                                                                                        | <input type="checkbox"/> True | <input type="checkbox"/> False |   |   |   |
| 18. Table salt is an essential part of a healthy diet                                                                                                                                                            | <input type="checkbox"/> True | <input type="checkbox"/> False |   |   |   |
| 19. Milk and milk products are the best sources of calcium                                                                                                                                                       | <input type="checkbox"/> True | <input type="checkbox"/> False |   |   |   |
| 20. Basic sugars like brown or granulated sugar, jam and honey are the most suitable energy sources for sportsmen.                                                                                               | <input type="checkbox"/> True | <input type="checkbox"/> False |   |   |   |
| 21. Carbohydrates are stored in muscles in the form of glycogen                                                                                                                                                  | <input type="checkbox"/> True | <input type="checkbox"/> False |   |   |   |
| 22. The last meal before a competition should be consumed 3-4 hours before the competition                                                                                                                       | <input type="checkbox"/> True | <input type="checkbox"/> False |   |   |   |
| <b>Section C: Nutrition Attitude Questions</b> (For each of the following questions, circle the number that best describes your answer, 1=Strongly agree, 2=Agree, 3=Undecided, 4=Disagree, 5=Strongly Disagree. |                               |                                |   |   |   |
| 1. The relationship between good eating habits and good health should be stressed to the athlete.                                                                                                                | 1                             | 2                              | 3 | 4 | 5 |
| 2. Coaches need to have good attitudes toward nutrition because of their close contact and influence upon athletes.                                                                                              | 1                             | 2                              | 3 | 4 | 5 |
| 3. The type of food an athlete eats affects his/her physical performance                                                                                                                                         | 1                             | 2                              | 3 | 4 | 5 |
| 4. What the athlete eats is only important if the athlete is trying to gain or lose weight.                                                                                                                      | 1                             | 2                              | 3 | 4 | 5 |
| 5. Nutrition is more important during the competitive season than during the off-season for the athlete                                                                                                          | 1                             | 2                              | 3 | 4 | 5 |
| 6. Food advertisements are a very reliable source of nutritional information                                                                                                                                     | 1                             | 2                              | 3 | 4 | 5 |
| 7. It is the coach's responsibility to stress good nutritional practices.                                                                                                                                        | 1                             | 2                              | 3 | 4 | 5 |
| 8. The athlete should schedule his/her activities so he/she has time to eat.                                                                                                                                     | 1                             | 2                              | 3 | 4 | 5 |
| 9. Learning about nutrition is not important for athletes because they eat so much food they always get the nutrients their bodies need.                                                                         | 1                             | 2                              | 3 | 4 | 5 |

## Nutrition knowledge, attitude and practices (KAP) of adolescent sports trainee in BKSP, Bangladesh

|                                                                                                     |                          |     |                          |    |   |
|-----------------------------------------------------------------------------------------------------|--------------------------|-----|--------------------------|----|---|
| 10. Learning facts about nutrition is the best way to achieve favorable changes in food habits      | 1                        | 2   | 3                        | 4  | 5 |
| 11. Nutritional counseling would be important to the athlete who is trying to change his/her weight | 1                        | 2   | 3                        | 4  | 5 |
| <b>Section D: Nutrition Practice Questions</b>                                                      |                          |     |                          |    |   |
| 1. Do you use supplements like multivitamin as an athlete?                                          | <input type="checkbox"/> | Yes | <input type="checkbox"/> | No |   |
| 2. I consume lots of fruits and vegetables                                                          | <input type="checkbox"/> | Yes | <input type="checkbox"/> | No |   |
| 3. I skip meals before a competition or an event                                                    | <input type="checkbox"/> | Yes | <input type="checkbox"/> | No |   |
| 4. I eat just before an event                                                                       | <input type="checkbox"/> | Yes | <input type="checkbox"/> | No |   |
| 5. I eat just after an event                                                                        | <input type="checkbox"/> | Yes | <input type="checkbox"/> | No |   |
| 6. I consume sports drinks every day during practice or when I feel dehydrated                      | <input type="checkbox"/> | Yes | <input type="checkbox"/> | No |   |
| 7. I eat adequate diet daily                                                                        | <input type="checkbox"/> | Yes | <input type="checkbox"/> | No |   |
| 8. I change my pattern of eating at the time of a competition                                       | <input type="checkbox"/> | Yes | <input type="checkbox"/> | No |   |
| 9. I always take my breakfast daily                                                                 | <input type="checkbox"/> | Yes | <input type="checkbox"/> | No |   |
| 10. I consume lots of water during and after training/competition                                   | <input type="checkbox"/> | Yes | <input type="checkbox"/> | No |   |
| 11. I always eat at least one hour before training/competition                                      | <input type="checkbox"/> | Yes | <input type="checkbox"/> | No |   |
| 12. I prefer snacks to special diet before training and competition                                 | <input type="checkbox"/> | Yes | <input type="checkbox"/> | No |   |
| 13. I eat at least 3times daily                                                                     | <input type="checkbox"/> | Yes | <input type="checkbox"/> | No |   |
| 14. I consume milk and milk products daily                                                          | <input type="checkbox"/> | Yes | <input type="checkbox"/> | No |   |
| 15. I consume alcohol to enhance my performance                                                     | <input type="checkbox"/> | Yes | <input type="checkbox"/> | No |   |
